# Supplementary material
Source: publisher figshare collection journal article supplement (https://frontiersin.figshare.com/ndownloader/files/17435552)

**Supplementary Figure 2.** Learning vector quantization error statistics for SOM training

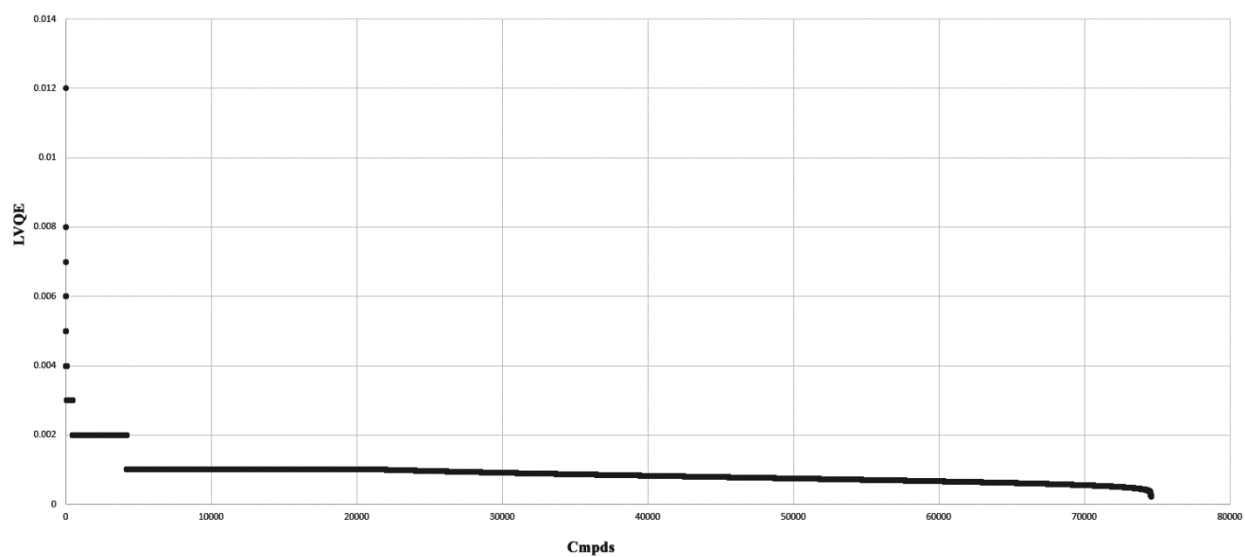

Supplement: Supplementary file [file 17435552]
